# Supplementary material
Source: PubMed Central journal article supplement (PMC7091087)
Supplement: 12275_2010_132_MOESM1_ESM.pdf [file 12275_2010_132_MOESM1_ESM.pdf]

**Supplementary data Table 1.** Origins, STs, Time and alleles number of *E. coli* O157:H7 isolated in China

| STs | Strains    | alleles number |             |            |             |             |             |             | Host   | Years |
|-----|------------|----------------|-------------|------------|-------------|-------------|-------------|-------------|--------|-------|
|     |            | <i>icdA</i>    | <i>uidA</i> | <i>mdh</i> | <i>fadD</i> | <i>lysp</i> | <i>aspc</i> | <i>clpx</i> |        |       |
| 836 | 00D049     | 3              | 4           | 1          | 4           | 2           | 1           | 1           | cattle | 2000  |
|     | 00H113     | 3              | 4           | 1          | 4           | 2           | 1           | 1           | cattle | 2000  |
|     | 00A004     | 3              | 4           | 1          | 4           | 2           | 1           | 1           | cattle | 2000  |
|     | 01A003     | 3              | 4           | 1          | 4           | 2           | 1           | 1           | cattle | 2000  |
|     | 01A002     | 3              | 4           | 1          | 4           | 2           | 1           | 1           | cattle | 2000  |
|     | 99A007     | 3              | 4           | 1          | 4           | 2           | 1           | 1           | cattle | 2000  |
|     | 99C150     | 3              | 4           | 1          | 4           | 2           | 1           | 1           | cattle | 2001  |
|     | 99A038     | 3              | 4           | 1          | 4           | 2           | 1           | 1           | fowl   | 2001  |
|     | 00C041     | 3              | 4           | 1          | 4           | 2           | 1           | 1           | fowl   | 2001  |
|     | 01F061     | 3              | 4           | 1          | 4           | 2           | 1           | 1           | fowl   | 2001  |
|     | 01F065     | 3              | 4           | 1          | 4           | 2           | 1           | 1           | fowl   | 1999  |
|     | 99F156     | 3              | 4           | 1          | 4           | 2           | 1           | 1           | fowl   | 2000  |
|     | 99A211     | 3              | 4           | 1          | 4           | 2           | 1           | 1           | human  | 1999  |
|     | 00S109     | 3              | 4           | 1          | 4           | 2           | 1           | 1           | human  | 1999  |
|     | 99G145     | 3              | 4           | 1          | 4           | 2           | 1           | 1           | human  | 1999  |
|     | 45679736   | 3              | 4           | 1          | 4           | 2           | 1           | 1           | human  | 1999  |
|     | 46645645   | 3              | 4           | 1          | 4           | 2           | 1           | 1           | human  | 1999  |
|     | 99B110     | 3              | 4           | 1          | 4           | 2           | 1           | 1           | pig    | 1999  |
|     | 676578     | 3              | 4           | 1          | 4           | 2           | 1           | 1           | pig    | 1999  |
|     | 34567654   | 3              | 4           | 1          | 4           | 2           | 1           | 1           | pig    | 1999  |
|     | 65947596   | 3              | 4           | 1          | 4           | 2           | 1           | 1           | pig    | 1999  |
|     | 00B020     | 3              | 4           | 1          | 4           | 2           | 1           | 1           | sheep  | 1999  |
|     | 00B014     | 3              | 4           | 1          | 4           | 2           | 1           | 1           | sheep  | 1999  |
|     | 99A011     | 3              | 4           | 1          | 4           | 2           | 1           | 1           | sheep  | 1999  |
|     | 99X131     | 3              | 4           | 1          | 4           | 2           | 1           | 1           | sheep  | 1999  |
|     | 99C166     | 3              | 4           | 1          | 4           | 2           | 1           | 1           | sheep  | 2000  |
|     | 99A004     | 3              | 4           | 1          | 4           | 2           | 1           | 1           | sheep  | 2007  |
|     | 99A014     | 3              | 4           | 1          | 4           | 2           | 1           | 1           | sheep  | 2001  |
|     | 99A005     | 3              | 4           | 1          | 4           | 2           | 1           | 1           | sheep  | 2001  |
|     | 99A029     | 3              | 4           | 1          | 4           | 2           | 1           | 1           | sheep  | 1999  |
|     | 99B095     | 3              | 4           | 1          | 4           | 2           | 1           | 1           | sheep  | 2000  |
|     | 00BO24     | 3              | 4           | 1          | 4           | 2           | 1           | 1           | sheep  | 1999  |
|     | 0157-07-13 | 3              | 4           | 1          | 4           | 2           | 1           | 1           | sheep  | 1999  |
|     | cq23435    | 3              | 4           | 1          | 4           | 2           | 1           | 1           | sheep  | 1999  |
|     | 564767     | 3              | 4           | 1          | 4           | 2           | 1           | 1           | sheep  | 2000  |
|     | 767687     | 3              | 4           | 1          | 4           | 2           | 1           | 1           | sheep  | 2007  |
|     | 4576578    | 3              | 4           | 1          | 4           | 2           | 1           | 1           | sheep  | 2001  |
|     | 56577565   | 3              | 4           | 1          | 4           | 2           | 1           | 1           | sheep  | 2001  |
|     | 565675366  | 3              | 4           | 1          | 4           | 2           | 1           | 1           | sheep  | 1999  |

|     |            |   |    |   |   |   |   |   |        |      |
|-----|------------|---|----|---|---|---|---|---|--------|------|
|     | 56464565   | 3 | 4  | 1 | 4 | 2 | 1 | 1 | sheep  | 2000 |
| 837 | 02A055     | 3 | 88 | 1 | 1 | 2 | 1 | 1 | sheep  | 1999 |
|     | 99A017     | 3 | 88 | 1 | 4 | 2 | 1 | 1 | cattle | 1999 |
|     | OOH113     | 3 | 88 | 1 | 4 | 2 | 1 | 1 | cattle | 1999 |
|     | OOA009     | 3 | 88 | 1 | 4 | 2 | 1 | 1 | cattle | 2000 |
|     | 00H116     | 3 | 88 | 1 | 4 | 2 | 1 | 1 | cattle | 2000 |
|     | 00H114     | 3 | 88 | 1 | 4 | 2 | 1 | 1 | cattle | 2000 |
|     | 00I119     | 3 | 88 | 1 | 4 | 2 | 1 | 1 | cattle | 2000 |
|     | 00C043     | 3 | 88 | 1 | 4 | 2 | 1 | 1 | cattle | 2000 |
|     | 00C030     | 3 | 88 | 1 | 4 | 2 | 1 | 1 | cattle | 2000 |
|     | OOA003     | 3 | 88 | 1 | 4 | 2 | 1 | 1 | cattle | 2000 |
|     | 01A002     | 3 | 88 | 1 | 4 | 2 | 1 | 1 | cattle | 2000 |
|     | 01A003     | 3 | 88 | 1 | 4 | 2 | 1 | 1 | cattle | 2000 |
|     | O157-07-10 | 3 | 88 | 1 | 4 | 2 | 1 | 1 | cattle | 2000 |
|     | 00F082     | 3 | 88 | 1 | 4 | 2 | 1 | 1 | cattle | 2000 |
|     | 0157-7-8   | 3 | 88 | 1 | 4 | 2 | 1 | 1 | cattle | 2000 |
|     | 00F077     | 3 | 88 | 1 | 4 | 2 | 1 | 1 | cattle | 2000 |
|     | 00F078     | 3 | 88 | 1 | 4 | 2 | 1 | 1 | cattle | 2000 |
|     | 24343      | 3 | 88 | 1 | 4 | 2 | 1 | 1 | cattle | 2000 |
|     | 457657     | 3 | 88 | 1 | 4 | 2 | 1 | 1 | cattle | 2000 |
|     | 94758696   | 3 | 88 | 1 | 4 | 2 | 1 | 1 | cattle | 2000 |
|     | 4356765    | 3 | 88 | 1 | 4 | 2 | 1 | 1 | cattle | 2000 |
|     | 44985845   | 3 | 88 | 1 | 4 | 2 | 1 | 1 | cattle | 2002 |
|     | 843056840  | 3 | 88 | 1 | 4 | 2 | 1 | 1 | cattle | 2001 |
|     | 00D055     | 3 | 88 | 1 | 4 | 2 | 1 | 1 | fowl   | 2001 |
|     | 00C037     | 3 | 88 | 1 | 4 | 2 | 1 | 1 | fowl   | 2001 |
|     | 00EO66     | 3 | 88 | 1 | 4 | 2 | 1 | 1 | fowl   | 2002 |
|     | 00B023     | 3 | 88 | 1 | 4 | 2 | 1 | 1 | fowl   | 2001 |
|     | 01F067     | 3 | 88 | 1 | 4 | 2 | 1 | 1 | fowl   | 2001 |
|     | 00EO66     | 3 | 88 | 1 | 4 | 2 | 1 | 1 | fowl   | 1999 |
|     | 99G146     | 3 | 88 | 1 | 4 | 2 | 1 | 1 | human  | 1999 |
|     | O157-07-21 | 3 | 88 | 1 | 4 | 2 | 1 | 1 | human  | 2007 |
|     | 4657767    | 3 | 88 | 1 | 4 | 2 | 1 | 1 | human  | 1999 |
|     | 34546754   | 3 | 88 | 1 | 4 | 2 | 1 | 1 | human  | 2007 |
|     | 99A021     | 3 | 88 | 1 | 4 | 2 | 1 | 1 | pig    | 2000 |
|     | 00A006     | 3 | 88 | 1 | 4 | 2 | 1 | 1 | pig    | 2000 |
|     | 99B080     | 3 | 88 | 1 | 4 | 2 | 1 | 1 | pig    | 2007 |
|     | 3456565    | 3 | 88 | 1 | 4 | 2 | 1 | 1 | pig    | 2000 |
|     | 6767784    | 3 | 88 | 1 | 4 | 2 | 1 | 1 | pig    | 2000 |
|     | 99A012     | 3 | 88 | 1 | 4 | 2 | 1 | 1 | sheep  | 2000 |
|     | 99C207     | 3 | 88 | 1 | 4 | 2 | 1 | 1 | sheep  | 2000 |
|     | 00B019     | 3 | 88 | 1 | 4 | 2 | 1 | 1 | sheep  | 2001 |
|     | 00H115     | 3 | 88 | 1 | 4 | 2 | 1 | 1 | sheep  | 2002 |

|     |                     |   |    |   |   |    |   |     |        |      |
|-----|---------------------|---|----|---|---|----|---|-----|--------|------|
|     | 00B024              | 3 | 88 | 1 | 4 | 2  | 1 | 1   | sheep  | 1999 |
|     | 00C039              | 3 | 88 | 1 | 4 | 2  | 1 | 1   | sheep  | 2001 |
|     | 00A007              | 3 | 88 | 1 | 4 | 2  | 1 | 1   | sheep  | 1999 |
|     | 02A056              | 3 | 88 | 1 | 4 | 2  | 1 | 1   | sheep  | 1999 |
|     | 01F062              | 3 | 88 | 1 | 4 | 2  | 1 | 1   | sheep  | 2000 |
|     | 01F064              | 3 | 88 | 1 | 4 | 2  | 1 | 1   | sheep  | 2000 |
|     | 02F044              | 3 | 88 | 1 | 4 | 2  | 1 | 1   | sheep  | 2002 |
|     | 99X133              | 3 | 88 | 1 | 4 | 2  | 1 | 1   | sheep  | 2001 |
|     | 00A008              | 3 | 88 | 1 | 4 | 2  | 1 | 1   | sheep  | 2001 |
|     | 00C038              | 3 | 88 | 1 | 4 | 2  | 1 | 1   | sheep  | 2001 |
|     | 01F062              | 3 | 88 | 1 | 4 | 2  | 1 | 1   | sheep  | 2002 |
|     | 937758569           | 3 | 88 | 1 | 4 | 2  | 1 | 1   | sheep  | 2001 |
|     | 5675434             | 3 | 88 | 1 | 4 | 2  | 1 | 1   | sheep  | 2001 |
|     | 85965069            | 3 | 88 | 1 | 4 | 2  | 1 | 1   | sheep  | 1999 |
|     | 930044              | 3 | 88 | 1 | 4 | 2  | 1 | 1   | sheep  | 1999 |
| 841 | 99G143              | 3 | 88 | 1 | 4 | 2  | 1 | 174 | cattle | 1999 |
|     | 01B014              | 3 | 88 | 1 | 4 | 2  | 1 | 174 | human  | 2001 |
|     | 99G147              | 3 | 88 | 1 | 4 | 2  | 1 | 174 | human  | 1999 |
|     | 99G144              | 3 | 88 | 1 | 4 | 2  | 1 | 174 | human  | 1999 |
| 838 | 00C039              | 7 | 4  | 1 | 4 | 2  | 1 | 1   | sheep  | 2000 |
| 839 | 02A008              | 3 | 4  | 1 | 1 | 2  | 1 | 3   | cattle | 2002 |
| 840 | 01F066              | 3 | 88 | 1 | 4 | 1  | 1 | 1   | fowl   | 2001 |
| 842 | 00G094              | 3 | 4  | 1 | 4 | 2  | 1 | 174 | human  | 2000 |
| 69  | EDL933 <sup>a</sup> | 3 | 4  | 4 | 4 | 2  | 1 | 1   | human  | 1982 |
| 66  | Sakai <sup>b</sup>  | 3 | 4  | 4 | 4 | 18 | 1 | 1   | human  | 1997 |

a: Burland, V., et al. *Nucleic Acids Res.* 26, 4196-4204. b: Makino, K., et al. *Genes Genet Syst.* 74, 227-239.
